# Supplementary material for: Wnt Signaling Drives Prostate Cancer Bone Metastatic Tropism and Invasion
Source: PubMed Central journal article supplement — Transl Oncol. 2020 Mar 25;13(4):100747. doi: 10.1016/j.tranon.2020.100747 (PMC7109463; doi:10.1016/j.tranon.2020.100747), 2020-03-25

# Supplementary Figure 1

| Target Genes | Primer Sequences        |
|--------------|-------------------------|
| m-Actin-F    | CATTGCTGACAGGATGCAGAAGG |
| m-Actin-R    | TGCTGGAAGGTGGACAGTGAGG  |
| m-SOST-F     | TCCTCCTGAGAACAACCAGACC  |
| m-SOST-R     | TCTGTCAGGAAGCGGGTGTAGT  |
| m-WIF1-F     | CTTTGCTGGGAACAGTGCCTCA  |
| m-WIF1-R     | GGTCCTAAGGATGGTGTTGCCT  |
| H-FZD8_F     | GCTCTACAACCGCGTCAAGACA  |
| H-FZD8_R     | AAGGTGGACACGAAGCAGAGCA  |
| H-FZD4_F     | TTCACACCGCTCATCCAGTACG  |
| H-FZD4_R     | ACGGGTTTACAGCGTCTCTTGA  |
| H-Actin-F    | CCAACCGCGAGAAGATGAC     |
| H-Actin-R    | TAGCACAGCCTGGATAGCAA    |

# Supplementary Figure 2

## FZDs expression in PC3 cells

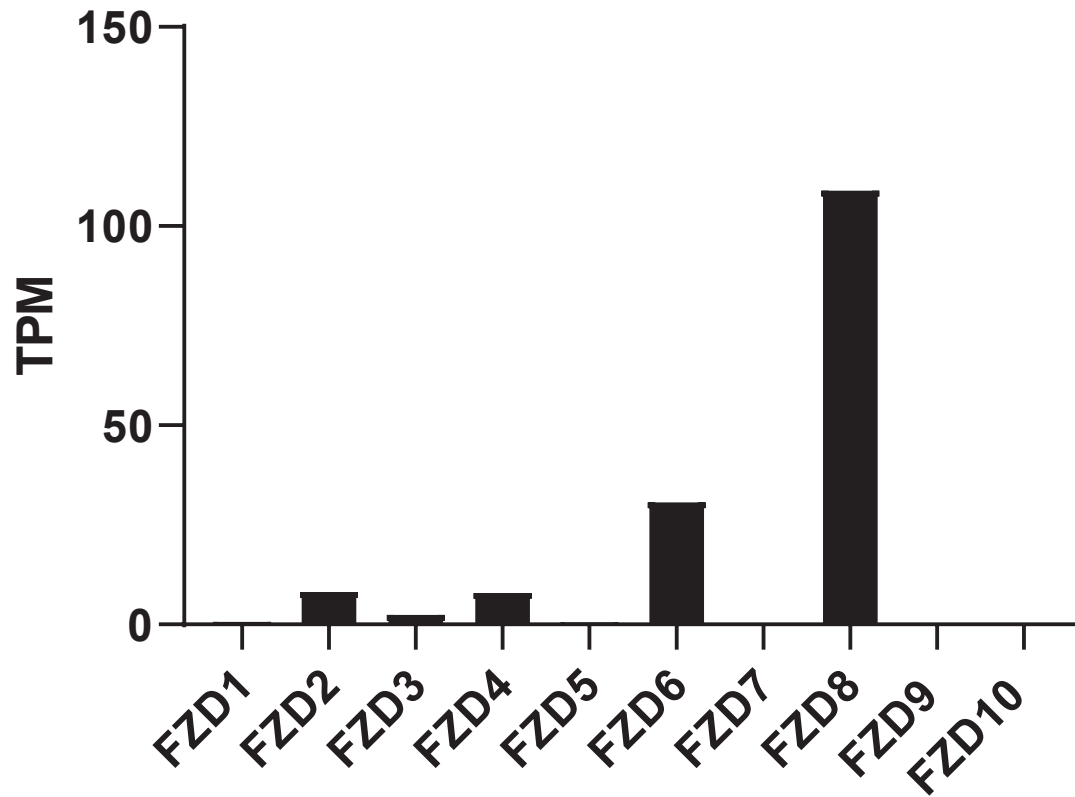

Supplement: mmc1.pdf [file mmc1.pdf]
